# Supplementary material for: Frequency and diagnostic reliability of laboratory variables in cows with traumatic reticuloperitonitis and type 1, 2, 3, 4 and 5 abomasal ulcer
Source: Research Square preprint supplement (doi:10.21203/rs.3.rs-96358/v1), 2020-10-26
Supplement: Supplementary file 1 [file 854e668335fdc0e5e54ba9f0.docx]

|  |  |
| --- | --- |
| **Prof. Dr. Dr. h. c. Ueli Braun**  Professor Emeritus  ueli.braun@uzh.ch |
| BMC Veterinary Research  Editor-in-Chief |
| Zurich, October 1, 2020 | |
|  | |

**Paper “Frequency and diagnostic reliability of laboratory variables in cows with traumatic reticuloperitonitis and type 1, 2, 3, 4 or 5 abomasal ulcer”**

Dear Editor

Please find enclosed the manuscript “Frequency and diagnostic reliability of laboratory variables in cows with traumatic reticuloperitonitis and type 1, 2, 3, 4 or 5 abomasal ulcer”. We would like to submit it for publication in the BMC Veterinary Research, since a study describing the findings reported describing these findings was not found in the literature to the knowledge of the authors.

All authors have read and approved the manuscript. They declare that they have no competing interests.

We hope that the manuscriptis acceptable for publication and I thank you.

Yours sincerely

Ueli Braun

Prof. Dr. med. vet. Dr. med. vet. h. c.

Emeritus-Professor der Vetsuisse-Fakultät Universität Zürich
